# Supplementary material
Source: PubMed Central journal article supplement (PMC6141049)
Supplement: NIHMS79053-supplement-List_of_Supplementary_Materials.pdf [file NIHMS79053-supplement-List_of_Supplementary_Materials.pdf]

## LIST OF SUPPLEMENTARY MATERIALS

### Methods

#### Supplementary Text

**Fig. S1.** Comparison of transcriptional strand bias between *in vitro* exposure to benzo[*a*]pyrene and signature 4 extracted from all tobacco-associated cancer types.

**Fig. S2.** Extracting the pattern of signature 4 from different cancer types.

**Fig. S3.** Similarity between extraction of signature 4 across different cancer types and other known mutational signatures.

**Fig. S4.** Sensitivity for detecting signature 4 in cervix, bladder and renal cancer.

**Fig. S5.** Strong transcriptional strand bias of signature 16.

**Fig. S6.** Comparison between lifelong non-smokers and smokers based on overall CpG methylation profiles.

**Fig. S7.** CpG islands and differentially methylated CpGs in smokers compared to non-smokers.

**Fig. S8.** Cancer tissue methylation of individual CpGs near genes differentially methylated in blood or buccal cells of smokers.

**Fig. S9.** Interquartile range of methylation levels in tobacco-associated cancer types.

**Fig. S10.** Mutation rate variation across normal cells can lead to complex relationships between cancer mutation burden and cancer risk.

#### References and notes (32 – 54)

#### Author Contributions

**Table S1:** Detailed information about each examined tobacco-associated cancer sample.

**Table S2:** Comparison of features of tobacco smokers to the ones of lifelong non-smokers.

**Table S3:** Relationships between mutational signatures and pack years smoked.

**Table S4:** Individual CpGs with differential methylation in lung adenocarcinoma.

**Table S5:** Individual CpGs with differential methylation in oral cancer.

**Table S6:** Numerical patterns of mutational signatures associated with tobacco smoking.
